# Supplementary material for: Oxygen Evolution Catalysis by Manganese Oxides Resilient to Voltage Fluctuations
Source: Research Square preprint supplement (doi:10.21203/rs.3.rs-5973633/v1), 2025-03-25
Supplement: Supplementary file 1 [file 7481d5fdc63a708128846682.pdf]

# Supplementary Materials for

## Oxygen Evolution Catalysis by Manganese Oxides Resilient to Voltage Fluctuations

**Authors:** Ailong Li<sup>1\*</sup>, Hideshi Ooka<sup>1</sup>, Shuang Kong<sup>1</sup>, Kiyohiro Adachi<sup>2</sup>, Sun Hee Kim<sup>3,4</sup>, Daisuke Hashizume<sup>2</sup>, Ryuhei Nakamura<sup>1,5\*</sup>

### Affiliations:

<sup>1</sup>Biofunctional Catalyst Research Team, RIKEN Center for Sustainable Resource Science (CSRS), 2-1 Hirosawa, Wako, Saitama, 351-0198, Japan

<sup>2</sup>Materials Characterization Support Team, RIKEN Center for Emergent Matter Science (CEMS), 2-1 Hirosawa, Wako, Saitama, 351-0198, Japan

<sup>3</sup>Metropolitan Seoul Center, Korea Basic Science Institute, Seoul, 03759, Republic of Korea

<sup>4</sup>Department of Chemistry, Chung-Ang University, Seoul, 06974, Republic of Korea

<sup>5</sup>Earth-Life Science Institute (ELSI), Institute of Science Tokyo, 2-12-1-I7E Ookayama, Meguro-ku, Tokyo, 152-8550, Japan

\*Corresponding author: ailong.li@riken.jp, ryuhei.nakamura@riken.jp

## Materials and Methods

### Electrode Fabrication

MnO<sub>2</sub> on an FTO substrate (7 Ω/sq surface resistivity, NPV-CFT2-7, AsOne, Japan) was synthesized by a thermal decomposition method. Briefly, 0.5 mL of 2 M Mn(NO<sub>3</sub>)<sub>2</sub> was dropped onto a clean FTO-coated glass and then calcined on a hotplate at 250 °C in air for 6 h. The resulting electrode was rinsed with Milli-Q ultra-pure water (18.2 MΩ cm at 25 °C, Merck Millipore), sonicated for 10 s, and then dried at 40 °C before measurements. A quartz crystal microbalance (QCM) electrode was prepared by a spray deposition method. Briefly, an Mn(NO<sub>3</sub>)<sub>2</sub> solution (4 M) was sprayed onto clean QCM quartz crystals (Platinum-coated, 10 MHz, Hokuto Denko Corp.), which were then heated at 250 °C for 12 h. MnO<sub>2</sub> was only deposited within the platinum coated area (defined using a mask) of the QCM quartz crystal.

### Kinetics analysis of the Guyard reaction

*In-situ* UV-Vis absorption spectra were obtained in diffuse transmission mode using a UV-Vis spectrometer (UV-2550, Shimadzu) equipped with a multipurpose large-sample compartment with a built-in integrating sphere (MPC-2200, Shimadzu). The kinetics of the Guyard reaction<sup>1-</sup>  
 $^3 (\text{Mn}^{7+} + 4 \text{Mn}^{2+} \rightarrow 5 \text{Mn}^{3+})$  was studied spectrophotometrically by recording the time course of absorbance at 545 nm. For the *in-situ* acquisition of spectra, the reactor was placed in front of the integrating sphere to collect the diffuse transmission light.

### EPR measurement in parallel and perpendicular modes

EPR measurements were performed using a Bruker EMX/Plus spectrometer equipped with a parallel and perpendicular dual-mode cavity (ER 4116DM)<sup>4</sup>. The temperature was controlled using a liquid He quartz cryostat (Oxford Instruments ESR900) equipped with a temperature and gas flow controller (Oxford Instruments ITC503). The experimental conditions were as follows: microwave frequency: 9.64 GHz (perpendicular mode) and 9.38 GHz (parallel mode); modulation amplitude: 10 G; modulation frequency: 100 kHz; microwave power: 0.03 mW (perpendicular mode) and 5.2 mW (parallel mode), temperature: 4 K; and sweep time: 232 s (perpendicular mode) and 100 s (parallel mode). EPR spectra were collected for different Mn oxidation states using the following modes: Mn<sup>7+</sup>, [Ar] 3d<sup>0</sup>, S = 0 (EPR silent in both modes);

$\text{Mn}^{2+}$   $[\text{Ar}]3d^5$ ,  $S = 5/2$  (EPR active in perpendicular mode);  $\text{Mn}^{3+}$ ,  $[\text{Ar}]3d^4$ ,  $S = 2$  (EPR active in parallel mode).

### **X-ray absorption for oxidation state measurement**

X-ray absorption spectra of the Mn K edge were recorded at the BL14B2 beamline of SPring-8. The analysis was performed on the Demeter software platform<sup>5</sup>. The threshold energy ( $E_0$ ) was determined at the point where the corresponding normalized absorption was equal to 0.5 in a XANES spectrum<sup>6</sup>. The average valence state of Mn was calculated from the linear regression line obtained from standard samples, such as  $\text{MnSO}_4$ ,  $\text{Mn}_2\text{O}_3$ , and  $\text{MnO}_2$ .

### ***In-situ* resonance Raman measurement**

Resonance Raman spectra were collected on a Raman microscopy system (Senterra, Bruker) using an excitation wavelength of 532 nm. The excitation light was focused on the sample using a microscope objective (Olympus LMPlanFL N 50X/0.5 BD long-focal length objective, 10.6 mm working distance) at a power of 0.5 mW to avoid damage induced by laser radiation. For the measurements, the laser was irradiated through an optical window and the electrolyte onto the working electrode surface.

### **Electrochemical measurements under fluctuation voltages**

Current versus potential curves were obtained with a commercial potentiostat (HZ-5000, Hokuto Denko) at room temperature ( $25 \pm 2$  °C).  $\text{MnO}_2$  loaded on an FTO substrate (geometric surface area of  $1 \text{ cm}^2$ ), was used as the working electrode and a Pt wire (99.98%, Nilaco) served as the counter electrode. The two electrodes were separated by a proton exchange membrane (Nafion 117, Sigma-Aldrich), which effectively assists in transporting proton ions selectively from the anode to the cathode compartment. The anode chamber was equipped with two optical windows for *in-situ* UV-Vis measurements and time-lapse recording. A sulfuric acid solution (pH 2, with 1.0 M  $\text{K}_2\text{SO}_4$  as the supporting electrolyte) was used as a base electrolyte, and 1.0 M phosphate (pH 2, prepared using  $\text{NaH}_2\text{PO}_4$  and  $\text{H}_3\text{PO}_4$ ) was added to induce the Guyard reaction.

### Cyclic voltammetry

Cyclic voltammetry measurements were conducted in a three-electrode cell. Ag/AgCl/KCl (saturated) was used as a reference electrode. Prior to every electrochemical experiment, the solution resistance was measured and  $iR$  compensation was then performed manually. Electrode potentials after  $iR$  compensation were rescaled to the reversible hydrogen electrode (RHE).

### QCM measurements

A setup assembled with an HQ-601DK mass sensor (Hokuto Denko) was used for QCM measurements<sup>7</sup>. The frequency changes ( $\Delta f$ ) during OER were recorded. Mass changes ( $\Delta m$ ) were calculated from  $\Delta f$  according to the Sauerbrey equation:

$$\Delta f = - \frac{2f_0^2 \Delta m}{A_{plezo} (\mu_q \cdot \rho_q)^{1/2}}$$

where  $f_0$  denotes the initial quartz crystal frequency (10 MHz),  $A_{plezo}$  is the area of the piezoelectrically active crystal (0.07 cm<sup>2</sup>),  $\mu_q$  is the shear modulus of quartz ( $2.947 \times 10^{11}$  dyn cm<sup>-2</sup>), and  $\rho_q$  is the density of quartz (2.648 g cm<sup>-3</sup>). The mass sensitivity of the QCM was  $\Delta m/\Delta f = 0.31$  ng Hz<sup>-1</sup>.

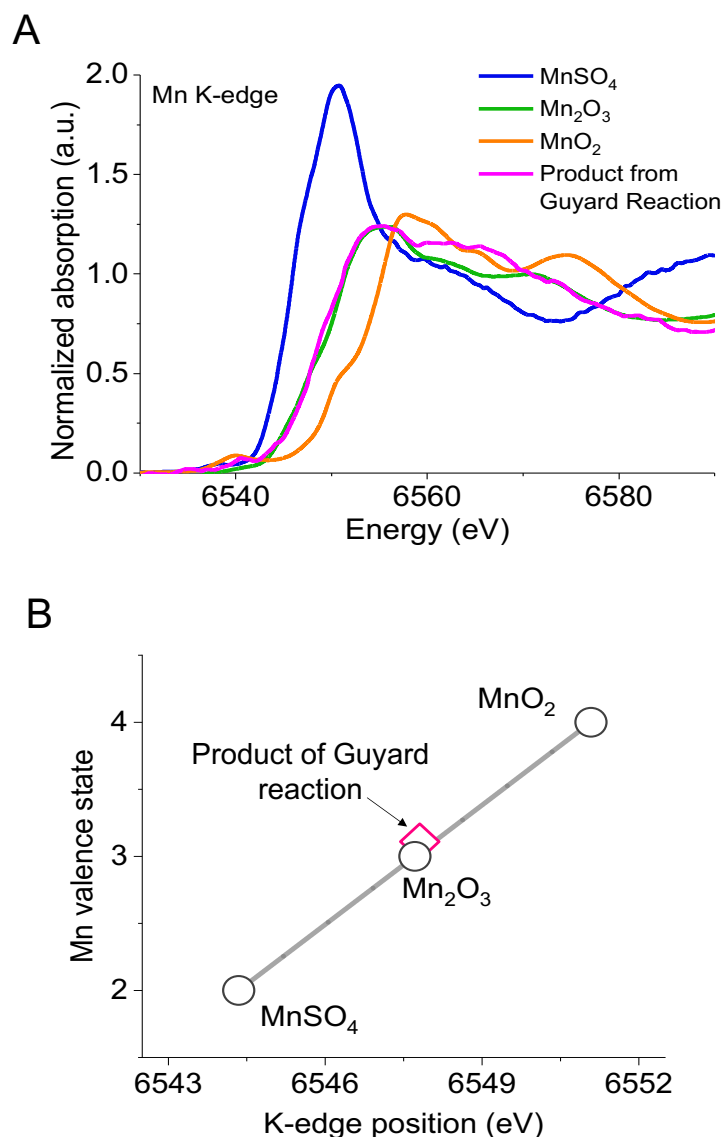

**Fig. S1. Normalized Mn K-edge XANES spectra to determine the valence state of manganese.** (A) Comparison of the XANES data for the product from the Guyard reaction and reference samples with known oxidation states:  $\text{Mn}^{2+}$  ( $\text{MnSO}_4$ ),  $\text{Mn}^{3+}$  ( $\text{Mn}_2\text{O}_3$ ) and  $\text{Mn}^{4+}$  ( $\text{MnO}_2$ ). (B) The valence state of the product from the Guyard reaction was estimated to be 3.0 from the linear fitting of the Mn valence and K-edge position, which was defined as the energy where the normalized absorption is 0.5.

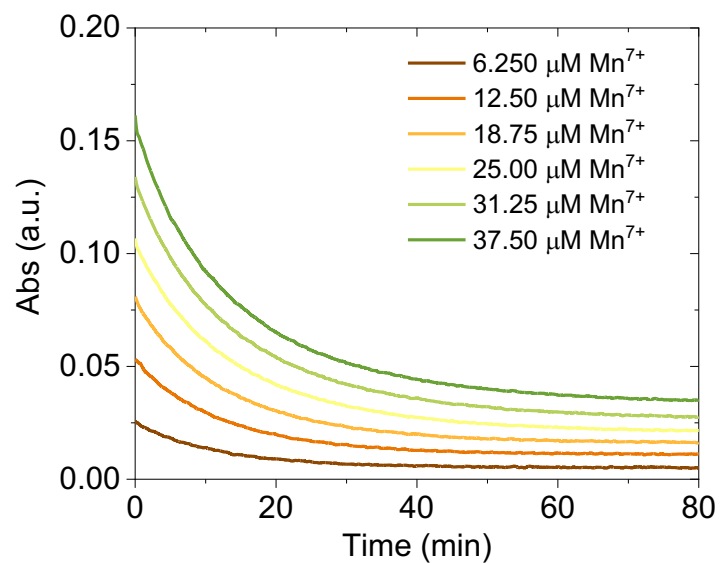

**Fig. S2. Measurement of the Guyard reaction kinetics by UV-Vis spectroscopy for  $\text{Mn}^{7+}$ .** Various concentrations of  $\text{Mn}^{7+}$  (6.25, 12.50, 18.75, 25.00, 31.25, and 37.50  $\mu\text{M}$ ) reacted with  $\text{Mn}^{2+}$  (300  $\mu\text{M}$ ) in 1.0 M of phosphate ions at pH 2 and room temperature. The time course of absorbance at 545 nm was plotted to show the reaction kinetics. The reaction was determined to be first order with respect to  $\text{Mn}^{7+}$ .

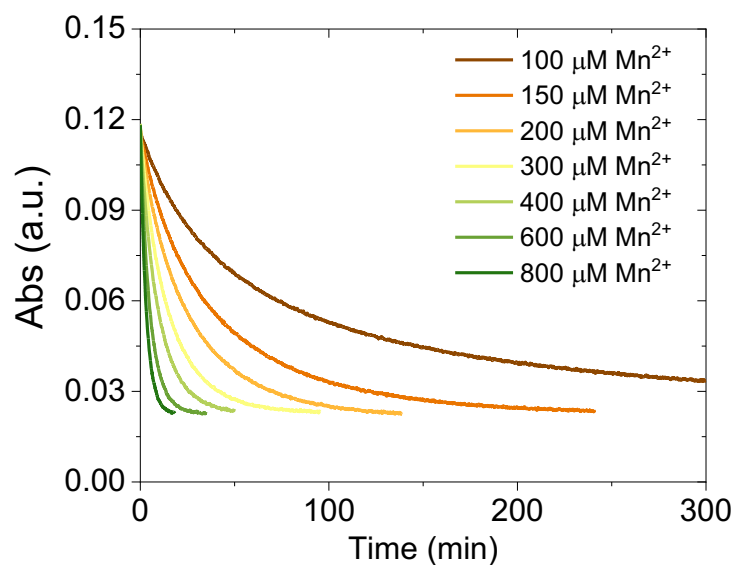

**Fig. S3. Measurement of the Guyard reaction kinetics by UV-Vis spectroscopy for  $\text{Mn}^{2+}$ .** Various concentrations of  $\text{Mn}^{2+}$  (100, 150, 200, 300, 400, 600, and 800  $\mu\text{M}$ ) reacted with  $\text{Mn}^{7+}$  (25  $\mu\text{M}$ ) in 1.0 M of phosphate ions at pH 2 and room temperature. The time course of absorbance at 545 nm was plotted to show the reaction kinetics. The reaction was determined to be pseudo-first-order ( $\sim 1.3$ ) with respect to  $\text{Mn}^{2+}$ .

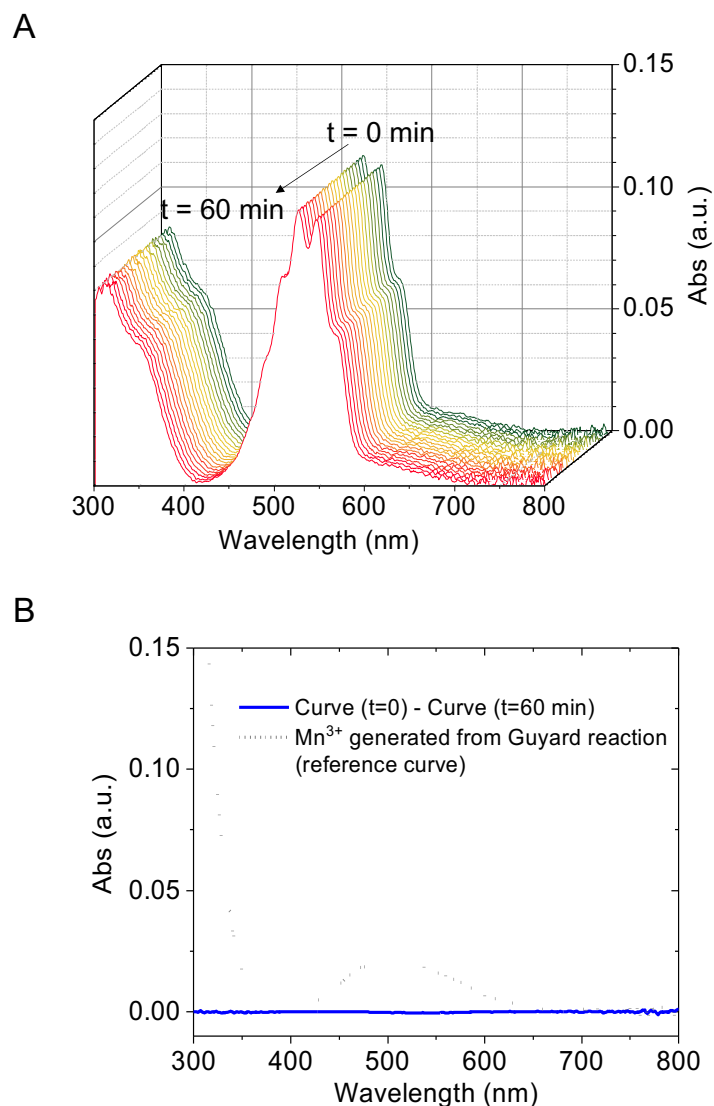

**Fig. S4. Measurement of the Guyard reaction kinetics without phosphate ions.** (A) UV-Vis spectra of the electrolyte during 1 h of reaction between  $\text{Mn}^{2+}$  ( $100 \mu\text{M}$ ) and  $\text{Mn}^{7+}$  ( $25 \mu\text{M}$ ) in pH 2 conditions without adding phosphate ions. The base electrolyte was prepared with  $\text{H}_2\text{SO}_4$  and 1M  $\text{K}_2\text{SO}_4$ . (B) No spectroscopic signatures of  $\text{Mn}^{3+}$  were observed when the reaction was conducted in sulfuric acid without phosphate ions for 1 h.



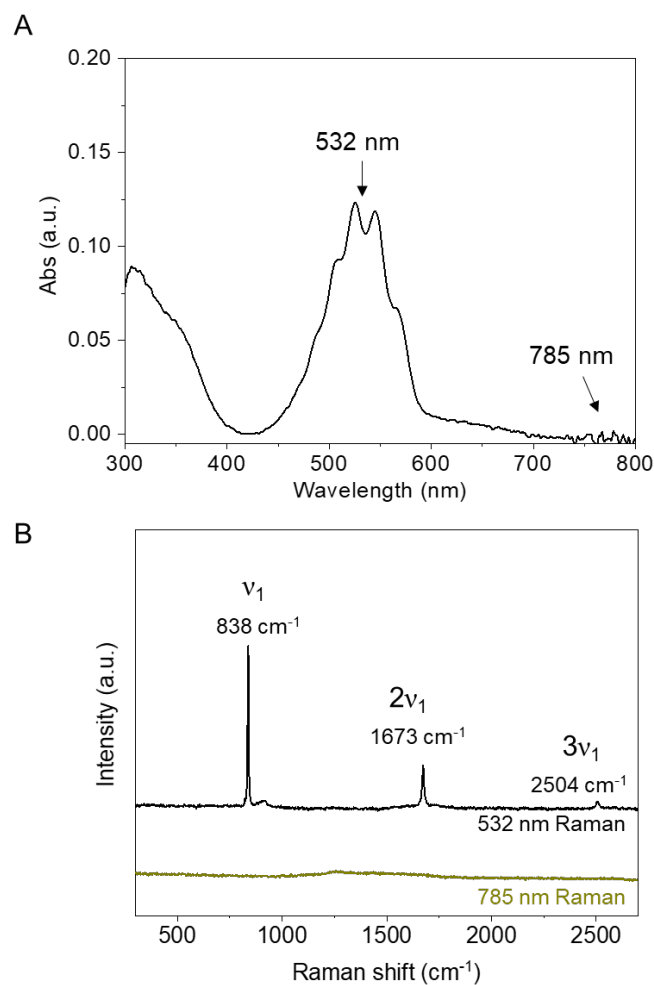

**Fig. S5. Resonance Raman spectroscopy for Mn<sup>7+</sup> measurement.** (A) Resonance Raman spectra were collected using an excitation wavelength of 532 nm, which is within the wavelength range where Mn<sup>7+</sup> shows maximum electronic transition. An excitation wavelength of 785 nm was used for comparison. (B) Raman spectra for Mn<sup>7+</sup> using excitation wavelengths of 532 and 785 nm. The  $\nu_1(A_1)$ ,  $2\nu_1(A_1)$  and  $3\nu_1(A_1)$  modes of MnO<sub>4</sub><sup>-</sup> ion with T<sub>d</sub> symmetry were observed using a resonance excitation wavelength of 532 nm, but these modes were not detected at an excitation wavelength of 785 nm.

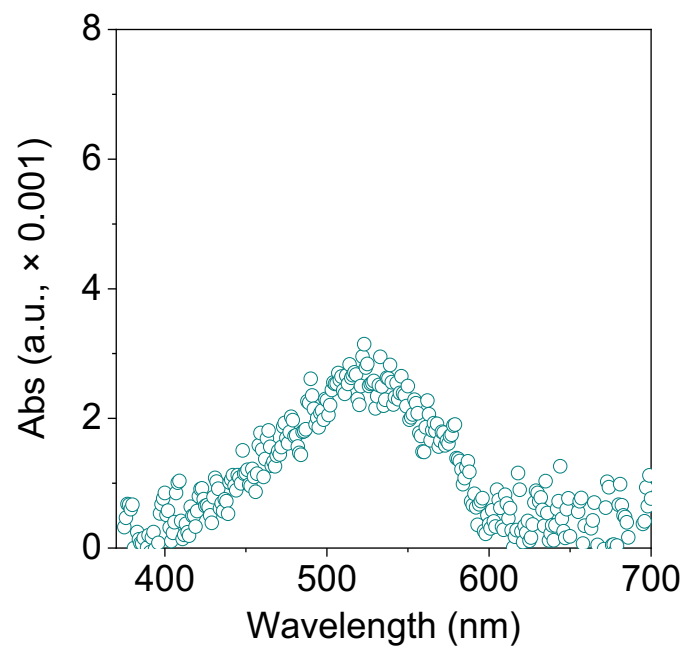

**Fig. S6. UV-Vis spectrum of the electrolyte after Raman measurement.** The electrolyte was analyzed by UV-Vis spectroscopy after completion of the Raman experiment presented in Fig. 5A.

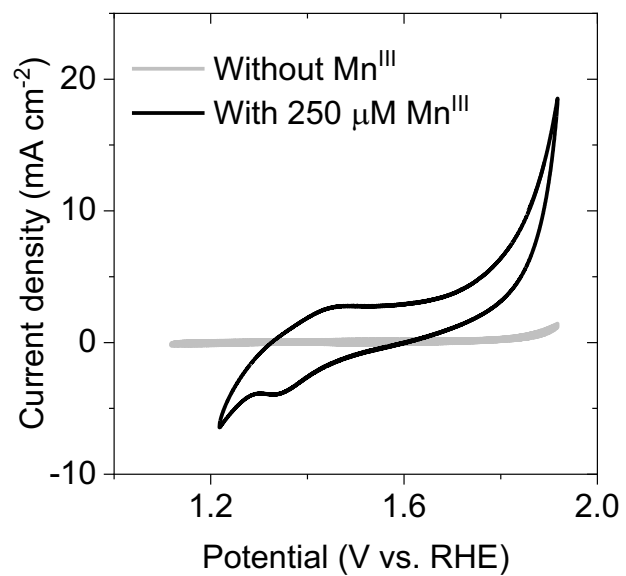

**Fig. S7. Cyclic voltammetric measurement of Mn<sup>III</sup>.** Cyclic voltammetric curves obtained in the presence (black curve) and absence of Mn<sup>3+</sup> (gray curve). The potentials are relative to reversible hydrogen electrode (RHE).

## References:

- 1 Guyard, A. Of the direct determination of manganese, antimony and uranium by the volumetric method and of several compounds of these metals. *Bull. Soc. Chim. Fr.* **1**, 89-95 (1864).
- 2 Mrákavová, M. & Treindl, Ľ. Kinetics of guyard's reaction with regard to permanganate chemical oscillators. *Collect. Czech. Chem. Commun.* **55**, 2898-2903 (1990).
- 3 Kovács, K. A., Gróf, P., Burai, L. & Riedel, M. Revising the mechanism of the permanganate/oxalate reaction. *J. Phys. Chem. A* **108**, 11026-11031 (2004).
- 4 Jin, K. *et al.* Mechanistic investigation of water oxidation catalyzed by uniform, assembled mno nanoparticles. *J. Am. Chem. Soc.* **139**, 2277-2285 (2017).
- 5 Ravel, B. & Newville, M. ATHENA, ARTEMIS, HEPHAESTUS: data analysis for X-ray absorption spectroscopy using IFEFFIT. *J. Synchrotron Radiat.* **12**, 537-541 (2005).
- 6 Kong, S. *et al.* Acid-stable manganese oxides for proton exchange membrane water electrolysis. *Nat. Catal.* **7**, 252-261 (2024).
- 7 Deakin, M. R. & Buttry, D. A. Electrochemical applications of the quartz crystal microbalance. *Anal. Chem.* **61**, 1147A-1154A (1989).
